# Supplementary material
Source: ML conference proceedings conference paper supplement (https://proceedings.neurips.cc/paper_files/paper/2021/hash/096ffc299200f51751b08da6d865ae95-Abstract.html)
Supplement: Supplementary file 1 [file 096ffc299200f51751b08da6d865ae95-Supplemental.pdf]

# Appendices

## A Proofs in Section 3

### A.1 Proof of Lemma 1

1. When  $e \notin W_\Phi$ , we have  $E = \mathbb{R}^d$  and  $W_{\Phi,E} = W_\Phi$ . By Theorem 1 in [10], we know that the projected Bellman equation (3.4) has a unique fixed point  $\theta^*$ . Thus,  $\mathcal{L} = \{\theta^*\}$ .

2. When  $e \in W_\Phi$ ,  $\theta_e$  is a unique solution to  $\Phi\theta = e$  as  $\Phi$  is full column rank. We first show that the set of solutions to the projected Bellman equation (3.4) takes the form  $\{\tilde{\theta} + c\theta_e | c \in \mathbb{R}\}$ , where  $\tilde{\theta}$  is any solution to (3.4). Let  $\theta := \tilde{\theta} + c\theta_e$  for any scalar  $c$ . Then,

$$\begin{aligned} \Pi_{D,W_\Phi} T^{(\lambda)} \Phi \theta &= \Pi_{D,W_\Phi} T^{(\lambda)} \Phi (\tilde{\theta} + c\theta_e) \\ &= \Pi_{D,W_\Phi} T^{(\lambda)} (\Phi \tilde{\theta} + ce) \\ &= \Pi_{D,W_\Phi} T^{(\lambda)} \Phi \tilde{\theta} + ce \\ &= \Phi \tilde{\theta} + c\Phi \theta_e \\ &= \Phi (\tilde{\theta} + c\theta_e) \\ &= \Phi \theta. \end{aligned}$$

On the other hand, suppose that  $\theta$  is not of the form  $\tilde{\theta} + c\theta_e$ . Then,

$$\begin{aligned} \Pi_{D,W_\Phi} T^{(\lambda)} \Phi \theta &= \Pi_{D,W_\Phi} T^{(\lambda)} \Phi (\theta - \tilde{\theta} + \tilde{\theta}) \\ &= \Pi_{D,W_\Phi} T^{(\lambda)} \Phi \tilde{\theta} + \Pi_{D,W_\Phi} P^{(\lambda)} \Phi (\theta - \tilde{\theta}) \\ &= \Phi \tilde{\theta} + \Pi_{D,W_\Phi} P^{(\lambda)} \Phi (\theta - \tilde{\theta}) \\ &\neq \Phi \tilde{\theta} + \Phi (\theta - \tilde{\theta}) \\ &= \Phi \theta, \end{aligned}$$

where the "not equal to" is due to Lemma 2 in [10] and the non-expansiveness of the projection  $\Pi_{D,W_\Phi}$ .

As the set of solutions to Eq. (3.4) is a line parallel to the subspace  $\{c\theta_e | c \in \mathbb{R}\}$  and  $E$  is the orthogonal complement of  $\{c\theta_e | c \in \mathbb{R}\}$ , there is a unique solution of Eq. (3.4) that lies in  $E$ . We refer to this particular solution as  $\theta^*$ . It then follows that  $\theta^*$  is also a solution to  $\Phi\theta = \Pi_{D,W_{\Phi,E}} T^{(\lambda)} \Phi \theta$ .

Now we just need to show that the solution to  $\Phi\theta = \Pi_{D,W_{\Phi,E}} T^{(\lambda)} \Phi \theta$  is unique. We notice that the equation  $\Phi\theta = \Pi_{D,W_{\Phi,E}} T^{(\lambda)} \Phi \theta$  is equivalent to

$$\underbrace{\Pi_{2,E} \Phi^\top D (P^{(\lambda)} - I) \Phi \theta}_{A'} = \underbrace{\Pi_{2,E} \Phi^\top D \left[ \frac{r(\mu)}{1-\lambda} e - \mathcal{R}^{(\lambda)} \right]}_{b'},$$

where  $\mathcal{R}^{(\lambda)} = (1-\lambda) \sum_{m=0}^{\infty} \lambda^m \sum_{k=0}^m P^k \mathcal{R}$ .

Suppose  $\theta^*$  is a solution of the equation  $\Phi\theta = \Pi_{D,W_{\Phi,E}} T^{(\lambda)} \Phi \theta$ . Then we know that  $\theta^*$  must lie in the subspace  $E$ . Thus, we have  $\Phi\theta^* = \Phi \Pi_{2,E} \theta^*$ . By the definition of the projection operator  $\Pi_{D,W_{\Phi,E}}$ , we have

$$\Pi_{D,W_{\Phi,E}} V = \operatorname{argmin}_{\tilde{V} \in \{\Phi\theta | \theta \in E\}} \|V - \tilde{V}\|_D = \operatorname{argmin}_{\tilde{V} \in \{\Phi \Pi_{2,E} \theta | \theta \in \mathbb{R}^d\}} \|V - \tilde{V}\|_D.$$

Therefore, using  $\Phi\theta^* = \Phi \Pi_{2,E} \theta^*$ , the equation  $\Phi\theta^* = \Pi_{D,W_{\Phi,E}} T^{(\lambda)} \Phi \theta^*$  is equivalent to

$$\Phi \Pi_{2,E} \theta^* \in \operatorname{argmin}_{\tilde{V} \in \{\Phi \Pi_{2,E} \theta | \theta \in \mathbb{R}^d\}} \|T^{(\lambda)} \Phi \Pi_{2,E} \theta^* - \tilde{V}\|_D.$$

Thus, by the first-order optimality condition and the definition of  $T^{(\lambda)}$ , we have

$$\Pi_{2,E} \Phi^\top D \left[ \mathcal{R}^{(\lambda)} - \frac{r(\mu)}{1-\lambda} e + P^{(\lambda)} \Phi \Pi_{2,E} \theta^* - \Phi \Pi_{2,E} \theta^* \right] = 0$$

Using  $\Phi \theta^* = \Phi \Pi_{2,E} \theta^*$  again and rearranging terms, we have

$$\Pi_{2,E} \Phi^\top D \left( P^{(\lambda)} - I \right) \Phi \theta = \Pi_{2,E} \Phi^\top D \left[ \frac{r(\mu)}{1-\lambda} e - \mathcal{R}^{(\lambda)} \right].$$

On the other hand, suppose  $\theta^*$  is in the subspace  $E$  and satisfies

$$\Pi_{2,E} \Phi^\top D \left( P^{(\lambda)} - I \right) \Phi \theta = \Pi_{2,E} \Phi^\top D \left[ \frac{r(\mu)}{1-\lambda} e - \mathcal{R}^{(\lambda)} \right].$$

Then, following the same arguments above reversely, we can show that  $\theta^*$  is a solution of the equation

$$\Phi \theta = \Pi_{D, W_{\Phi, E}} T^{(\lambda)} \Phi \theta.$$

For any  $\theta \in E$ , we have

$$\begin{aligned} \theta^\top A' \theta &= \theta^\top \Pi_{2,E} \Phi^\top D \left( P^{(\lambda)} - I \right) \Phi \theta \\ &= \theta^\top \Pi_{2,E}^\top \Phi^\top D \left( P^{(\lambda)} - I \right) \Phi \theta \\ &= (\Pi_{2,E} \theta)^\top \Phi^\top D \left( P^{(\lambda)} - I \right) \Phi \theta \\ &= \theta^\top \Phi^\top D \left( P^{(\lambda)} - I \right) \Phi \theta \\ &\leq -\Delta \|\theta\|_2^2, \end{aligned}$$

where the last inequality is due to Lemma 2. Suppose  $A' \theta_1 = b'$  and  $A' \theta_2 = b'$  for some  $\theta_1, \theta_2 \in E$ . Then,  $0 = (\theta_1 - \theta_2)^\top A' (\theta_1 - \theta_2) \leq -\Delta \|\theta_1 - \theta_2\|_2^2$ , which implies  $\theta_1 = \theta_2$ . Therefore,  $\Phi \theta = \Pi_{D, W_{\Phi, E}} T^{(\lambda)} \Phi \theta$  has a unique solution.

## A.2 Proof of Lemma 2

For every  $\theta \in E$ , we have  $\Phi \theta \neq e$ . This is because

- (1) if  $e \notin W_\Phi$ , then there is no  $\theta \in \mathbb{R}^d = E$  satisfying  $\Phi \theta = e$ .
- (2) if  $e \in W_\Phi$ , then  $\theta_e \notin E$  is the unique solution to  $\Phi \theta = e$ .

Thus  $V_\theta := \Phi \theta$  is a non-constant vector in  $\mathbb{R}^{|S|}$  for any  $\theta \in E$ . Using the fact proved in Lemma 7 of [10] that  $J^\top D (I - P^{(\lambda)}) J > 0$  for any non-constant vector  $J \in \mathbb{R}^{|S|}$ , for any non-zero  $\theta \in E$ , we have

$$\theta^\top \Phi^\top D \left( I - P^{(\lambda)} \right) \Phi \theta = V_\theta^\top D \left( I - P^{(\lambda)} \right) V_\theta > 0.$$

Since the set  $\{\theta \in E \mid \|\theta\|_2 = 1\}$  is nonempty and compact, by the extreme value theorem, we have

$$\Delta := \min_{\|\theta\|_2=1, \theta \in E} \theta^\top \Phi^\top D \left( I - P^{(\lambda)} \right) \Phi \theta > 0.$$

Under Assumption 1, the steady-state expectations  $A := \mathbb{E}_\pi [A(X_t)]$  is given by

$$A = \begin{bmatrix} -c_\alpha & 0 \\ -\frac{1}{1-\lambda} \Phi^\top D e & \Phi^\top D (P^{(\lambda)} - I) \Phi \end{bmatrix},$$

We first rewrite the minimization problem  $\min_{\|\Theta\|_2=1, \Theta \in \mathbb{R} \times E} -\Theta^\top A \Theta$  as

$$\min_{\sqrt{\bar{r}^2 + \|\theta\|_2^2} = 1, \bar{r} \in \mathbb{R}, \theta \in E} c_\alpha \bar{r}^2 + \frac{\bar{r}}{1-\lambda} \theta^\top \Phi^\top D e + \theta^\top \Phi^\top D \left( I - P^{(\lambda)} \right) \Phi \theta.$$

Since

$$\begin{aligned}
\left| \frac{\bar{r}}{1-\lambda} \theta^\top \Phi^\top D e \right| &= \frac{|\bar{r}|}{1-\lambda} \left| \theta^\top \Phi^\top D e \right| \\
&= \frac{|\bar{r}|}{1-\lambda} \left| (\Phi \theta)^\top \pi \right| \\
&\leq \frac{|\bar{r}|}{1-\lambda} \|\pi\|_1 \|\Phi \theta\|_\infty \\
&= \frac{|\bar{r}|}{1-\lambda} \|\Phi \theta\|_\infty \\
&\leq \frac{|\bar{r}|}{1-\lambda} \max_{i \in \mathcal{S}} \|\phi(i)\|_2 \|\theta\|_2 \\
&\leq \frac{|\bar{r}| \|\theta\|_2}{1-\lambda}, \quad \forall \bar{r} \in \mathbb{R}, \theta \in E,
\end{aligned}$$

and

$$\theta^\top \Phi^\top D (I - P^{(\lambda)}) \Phi \theta \geq \Delta \|\theta\|_2^2, \quad \forall \theta \in E,$$

then we have

$$\begin{aligned}
&\min_{\sqrt{\bar{r}^2 + \|\theta\|_2^2} = 1, \bar{r} \in \mathbb{R}, \theta \in E} c_\alpha \bar{r}^2 + \frac{\bar{r}}{1-\lambda} \theta^\top \Phi^\top D e + \theta^\top \Phi^\top D (I - P^{(\lambda)}) \Phi \theta \\
&\geq \min_{\sqrt{\bar{r}^2 + \|\theta\|_2^2} = 1, \bar{r} \in \mathbb{R}, \theta \in E} c_\alpha \bar{r}^2 - \frac{|\bar{r}| \|\theta\|_2}{1-\lambda} + \Delta \|\theta\|_2^2 \\
&= \min_{\bar{r} \in [-1, 1]} c_\alpha |\bar{r}|^2 - \frac{1}{1-\lambda} |\bar{r}| \sqrt{1 - |\bar{r}|^2} + \Delta (1 - |\bar{r}|^2) \\
&= \min_{x \in [0, 1]} c_\alpha x - \frac{1}{1-\lambda} \sqrt{x(1-x)} + \Delta (1-x) \\
&= \Delta + \min_{x \in [0, 1]} (c_\alpha - \Delta) x - \frac{1}{1-\lambda} \sqrt{x(1-x)}.
\end{aligned}$$

When  $c_\alpha \geq \Delta + \sqrt{\frac{1}{\Delta^2(1-\lambda)^4} - \frac{1}{(1-\lambda)^2}}$ , we have

$$\min_{x \in [0, 1]} (c_\alpha - \Delta) x - \frac{1}{1-\lambda} \sqrt{x(1-x)} \geq -\frac{\Delta}{2},$$

which implies that

$$\min_{\|\Theta\|_2 = 1, \Theta \in \mathbb{R} \times E} -\Theta^\top A \Theta \geq \frac{\Delta}{2}.$$

### A.3 Proof of Theorem 1

*Proof. Part (1): auxiliary algorithm.* Suppose the sequence of iterates  $\{(\bar{r}_t, \theta_t)\}$  is generated by Algorithm 1. Then, the sequence of iterates  $\{(\bar{r}_t, \Pi_{2,E} \theta_t)\}$  can be generated by the following auxiliary algorithm

$$\bar{r}_{t+1} = \bar{r}_t + c_\alpha \beta_t (\mathcal{R}(s_t) - \bar{r}_t) \text{ and } \theta_{t+1} = \theta_t + \beta_t \delta_t(\theta_t) \Pi_{2,E} z_t, \quad (\text{A.1})$$

with initial values  $\bar{r}_0$  and  $\Pi_{2,E} \theta_0$ . Note that the iterates  $\{(\bar{r}_t, \theta_t)\}$  uniquely determines the iterates  $\{(\bar{r}_t, \Pi_{2,E} \theta_t)\}$ .

The auxiliary algorithm (A.1) can be rewritten in the following vector form

$$\Theta_{t+1} = \Theta_t + \beta_t \left[ \tilde{A}(X_t) \Theta_t + \tilde{b}(X_t) \right], \quad (\text{A.2})$$

where

$$\tilde{A}(X_t) = \begin{bmatrix} -c_\alpha & 0 \\ -\Pi_{2,E} z_t & \Pi_{2,E} z_t (\phi(s_{t+1})^\top - \phi(s_t)^\top) \end{bmatrix}$$

and

$$\tilde{b}(X_t) = \begin{bmatrix} c_\alpha \mathcal{R}(s_t) \\ \mathcal{R}(s_t) \Pi_{2,E} z_t \end{bmatrix}.$$

If we define

$$\Pi := \begin{bmatrix} 1 & 0 \\ 0 & \Pi_{2,E} \end{bmatrix},$$

then we have  $\tilde{A}(X_t) = \Pi A(X_t)$  and  $\tilde{b}(X_t) = \Pi b(X_t)$ .

Under Assumption 1, the steady-state expectations  $\tilde{A} := \mathbb{E}_\pi [\tilde{A}(X_t)]$  and  $\tilde{b} := \mathbb{E}_\pi [\tilde{b}(X_t)]$  are given by

$$\tilde{A} = \Pi A = \begin{bmatrix} -\frac{c_\alpha}{1-\lambda} \Pi_{2,E} \Phi^\top D e & 0 \\ \Pi_{2,E} \Phi^\top D (P^{(\lambda)} - I) \Phi \end{bmatrix},$$

and

$$\tilde{b} = \Pi b = \begin{bmatrix} c_\alpha r(\mu) \\ \Pi_{2,E} \Phi^\top D \mathcal{R}^{(\lambda)} \end{bmatrix}.$$

Stochastic approximation theory shows that the asymptotic behavior of the sequence  $\{(\bar{r}_t, \Pi_{2,E} \theta_t)\}$  generated by (A.1) is closely linked with the corresponding ordinary differential equation  $\dot{\Theta}_t = \tilde{A} \Theta_t + \tilde{b}$  and the limit point of  $\{(\bar{r}_t, \Pi_{2,E} \theta_t)\}$  should satisfies the equation  $\tilde{A} \Theta + \tilde{b} = 0$ . Solving this equation, we have the limit point of  $\{(\bar{r}_t, \Pi_{2,E} \theta_t)\}$  is  $(r(\mu), \theta^*)$ .

We notice that

$$\begin{aligned} & \min_{\|\Theta\|_2=1, \Theta \in \mathbb{R} \times E} -\Theta^\top \tilde{A} \Theta \\ &= \min_{\sqrt{\bar{r}^2 + \|\theta\|_2^2}=1, \bar{r} \in \mathbb{R}, \theta \in E} c_\alpha \bar{r}^2 + \frac{\bar{r}}{1-\lambda} \theta^\top \Pi_{2,E} \Phi^\top D e + \theta^\top \Pi_{2,E} \Phi^\top D (I - P^{(\lambda)}) \Phi \theta \\ &= \min_{\sqrt{\bar{r}^2 + \|\theta\|_2^2}=1, \bar{r} \in \mathbb{R}, \theta \in E} c_\alpha \bar{r}^2 + \frac{\bar{r}}{1-\lambda} \theta^\top \Phi^\top D e + \theta^\top \Phi^\top D (I - P^{(\lambda)}) \Phi \theta \\ &= \min_{\|\Theta\|_2=1, \Theta \in \mathbb{R} \times E} -\Theta^\top A \Theta \geq \frac{\Delta}{2}. \end{aligned}$$

Furthermore,

$$\begin{aligned} \|\tilde{A}(X_t)\|_2 &= \|\Pi A(X_t)\|_2 \\ &\leq \|A(X_t)\|_2 \\ &\leq \|A(X_t)\|_F \\ &= \sqrt{c_\alpha^2 + \|z_t\|_2^2 + \|z_t [\phi(s_{t+1})^\top - \phi(s_t)^\top]\|_F^2} \\ &\leq \sqrt{c_\alpha^2 + \|z_t\|_2^2 + \|z_t [\phi(s_{t+1})^\top - \phi(s_t)^\top]\|_2^2} \\ &\leq \sqrt{c_\alpha^2 + \|z_t\|_2^2 + (\|z_t\|_2 \|\phi(s_{t+1})\|_2 + \|z_t\|_2 \|\phi(s_t)\|_2)^2} \\ &\leq \sqrt{c_\alpha^2 + \frac{1}{(1-\lambda)^2} + \frac{4}{(1-\lambda)^2}} \\ &= \sqrt{c_\alpha^2 + \frac{5}{(1-\lambda)^2}}, \end{aligned}$$

and

$$\begin{aligned}
\|\tilde{b}(X_t)\| &= \|\Pi b(X_t)\|_2 \\
&\leq \|b(X_t)\|_2 \\
&\leq \sqrt{(c_\alpha \mathcal{R}(s_t))^2 + \mathcal{R}(s_t)^2 \|z_t\|_2^2} \\
&\leq \sqrt{c_\alpha^2 + \frac{1}{(1-\lambda)^2}}.
\end{aligned}$$

**Part (2): general finite-time bound.** For ease of notation, we let

$$\mathbb{E}_t[\cdot] := \mathbb{E}[\cdot | \Theta_{t-\tau(\beta_t)}, X_{t-\tau(\beta_t)}],$$

and

$$\beta_{t_1, t_2} := \sum_{k=t_1}^{t_2} \beta_k.$$

Note that in this part,  $\Theta_t := \begin{bmatrix} \bar{r}_t \\ \Pi_{2,E} \theta_t \end{bmatrix}$ ,  $\Theta^* := \begin{bmatrix} r(\mu) \\ \theta^* \end{bmatrix}$ ,  $A(X_t) := \tilde{A}(X_t)$ ,  $A := \tilde{A}$ ,  $b(X_t) := \tilde{b}(X_t)$ ,  $b := \tilde{b}$ ,  $A_{\max} := \sqrt{c_\alpha^2 + \frac{5}{(1-\lambda)^2}}$ ,  $b_{\max} := \sqrt{c_\alpha^2 + \frac{1}{(1-\lambda)^2}}$ ,  $\eta := \sqrt{c_\alpha^2 + \frac{5}{(1-\lambda)^2}}$ .

The step size sequence  $\{\beta_t\}$  satisfies the following conditions: (i)  $\{\beta_t\}$  are positive and non-increasing; (ii) there exists a smallest positive integer  $t^*$  such that  $\beta_{0, t^*-1} \leq \frac{1}{2\eta}$ , and for all  $t \geq t^*$ ,

$$\beta_{t-\tau(\beta_t), t-1} \leq \min\left\{\frac{1}{4\eta}, \frac{\Delta}{228\eta^2}\right\} \text{ and } \frac{\beta_{t-\tau(\beta_t), t-1}}{\tau(\beta_t)\beta_t} \leq 2.$$

For ant  $t \geq 0$ , we have

$$\begin{aligned}
&\mathbb{E}_t[\|\Theta_{t+1} - \Theta^*\|_2^2 - \|\Theta_t - \Theta^*\|_2^2] \\
&= \mathbb{E}_t[\|\Theta_{t+1} - \Theta_t + \Theta_t - \Theta^*\|_2^2 - \|\Theta_t - \Theta^*\|_2^2] \\
&= \mathbb{E}_t[\|\Theta_{t+1} - \Theta_t\|_2^2 + 2(\Theta_t - \Theta^*)^\top (\Theta_{t+1} - \Theta_t)] \\
&= \mathbb{E}_t[\|\Theta_{t+1} - \Theta_t\|_2^2] + 2\beta_t \mathbb{E}_t[(\Theta_t - \Theta^*)^\top (A(X_t)\Theta_t + b(X_t))] \\
&= \beta_t^2 \mathbb{E}_t[\|A(X_t)\Theta_t + b(X_t)\|_2^2] \\
&\quad + 2\beta_t \mathbb{E}_t[(\Theta_t - \Theta^*)^\top (A(X_t)\Theta_t + b(X_t) - A\Theta_t - b)] \\
&\quad + 2\beta_t \mathbb{E}_t[(\Theta_t - \Theta^*)^\top (A\Theta_t + b)]
\end{aligned}$$

**step 1.** Bounding  $\|A(X_t)\Theta_t + b(X_t)\|_2^2$

Since  $A(X_t)$  and  $b(X_t)$  are uniformly bounded by  $A_{\max}$  and  $b_{\max}$  respectively, we then have

$$\begin{aligned}
\|A(X_t)\Theta_t + b(X_t)\|_2 &\leq \|A(X_t)\|_2 \|\Theta_t\|_2 + \|b(X_t)\|_2 \\
&\leq A_{\max} \|\Theta_t\|_2 + b_{\max} \\
&\leq \eta (\|\Theta_t\|_2 + 1),
\end{aligned}$$

which implies that

$$\begin{aligned}
\|A(X_t)\Theta_t + b(X_t)\|_2^2 &\leq \eta^2 (\|\Theta_t - \Theta^* + \Theta^*\|_2 + 1)^2 \\
&\leq \eta^2 (\|\Theta_t - \Theta^*\|_2 + \|\Theta^*\|_2 + 1)^2 \\
&\leq 2\eta^2 [\|\Theta_t - \Theta^*\|_2^2 + (\|\Theta^*\|_2 + 1)^2].
\end{aligned}$$

**step 2.** Bounding  $(\Theta_t - \Theta^*)^\top (A\Theta_t + b)$

Since  $A\Theta^* + b = 0$  and  $\min_{\|\Theta\|_2=1, \Theta \in \mathbb{R} \times E} -\Theta^\top A\Theta \geq \frac{\Delta}{2}$

$$\begin{aligned} (\Theta_t - \Theta^*)^\top (A\Theta_t + b) &= (\Theta_t - \Theta^*)^\top (A\Theta_t - A\Theta^*) \\ &= (\Theta_t - \Theta^*)^\top A(\Theta_t - \Theta^*) \\ &\leq -\frac{\Delta}{2} \|\Theta_t - \Theta^*\|_2^2 \end{aligned}$$

**step 3.** Bounding  $\mathbb{E}_t \left[ (\Theta_t - \Theta^*)^\top (A(X_t)\Theta_t + b(X_t) - A\Theta_t - b) \right]$

$$\begin{aligned} &\mathbb{E}_t \left[ (\Theta_t - \Theta^*)^\top (A(X_t)\Theta_t + b(X_t) - A\Theta_t - b) \right] \\ &= \mathbb{E}_t \left[ (\Theta_t - \Theta_{t-\tau(\beta_t)} + \Theta_{t-\tau(\beta_t)} - \Theta^*)^\top (A(X_t)\Theta_t + b(X_t) - A\Theta_t - b) \right] \\ &= \underbrace{\mathbb{E}_t \left[ (\Theta_t - \Theta_{t-\tau(\beta_t)})^\top (A(X_t)\Theta_t + b(X_t) - A\Theta_t - b) \right]}_{(A_1)} \\ &\quad + \underbrace{\mathbb{E}_t \left[ (\Theta_{t-\tau(\beta_t)} - \Theta^*)^\top (A(X_t)\Theta_t + b(X_t) - A\Theta_t - b) \right]}_{(A_2)} \end{aligned}$$

$$\begin{aligned} (A_1) &\leq \mathbb{E}_t \left[ \|(\Theta_t - \Theta_{t-\tau(\beta_t)})\|_2 \|A(X_t)\Theta_t + b(X_t) - A\Theta_t - b\|_2 \right] \\ &\leq \mathbb{E}_t \left[ \|(\Theta_t - \Theta_{t-\tau(\beta_t)})\|_2 \|A(X_t)\Theta_t + b(X_t) - A\Theta_t - b\|_2 \right] \\ &\leq 2\eta \mathbb{E}_t \left[ (\|\Theta_t\|_2 + 1) \|\Theta_t - \Theta_{t-\tau(\beta_t)}\|_2 \right] \\ &\leq 8\eta^2 \beta_{t-\tau(\beta_t), t-1} \mathbb{E}_t \left[ (\|\Theta_t\|_2 + 1)^2 \right] \\ &\leq 8\eta^2 \beta_{t-\tau(\beta_t), t-1} \mathbb{E}_t \left[ (\|\Theta_t - \Theta^*\|_2 + \|\Theta^*\|_2 + 1)^2 \right] \\ &\leq 16\eta^2 \beta_{t-\tau(\beta_t), t-1} \mathbb{E}_t \left[ \|\Theta_t - \Theta^*\|_2^2 + (\|\Theta^*\|_2 + 1)^2 \right] \end{aligned}$$

The 4th inequality holds because for any  $0 \leq t_1 < t_2$  satisfying  $\beta_{t_1, t_2-1} \leq \frac{1}{4\eta}$ , the following inequality (see lemma 2.3 in [16] for a proof) hold:

$$\|\Theta_{t_2} - \Theta_{t_1}\|_2 \leq 4\eta \beta_{t_1, t_2-1} (\|\Theta_{t_2}\|_2 + 1).$$

Since we have assumed that  $\beta_{t-\tau(\beta_t), t-1} \leq \frac{1}{4\eta}$ , then we have

$$2\eta \mathbb{E}_t \left[ (\|\Theta_t\|_2 + 1) \|\Theta_t - \Theta_{t-\tau(\beta_t)}\|_2 \right] \leq 8\eta^2 \beta_{t-\tau(\beta_t), t-1} \mathbb{E}_t \left[ (\|\Theta_t\|_2 + 1)^2 \right].$$

Note that

$$\begin{aligned} &A(X_t)\Theta_t + b(X_t) - A\Theta_t - b \\ &= A(X_t)\Theta_{t-\tau(\beta_t)} - A\Theta_{t-\tau(\beta_t)} + b(X_t) - b \\ &\quad + A(X_t)\Theta_t - A\Theta_t - A(X_t)\Theta_{t-\tau(\beta_t)} + A\Theta_{t-\tau(\beta_t)} \\ &= [(A(X_t) - A)\Theta_{t-\tau(\beta_t)} + b(X_t) - b] + (A(X_t) - A)(\Theta_t - \Theta_{t-\tau(\beta_t)}) \end{aligned}$$

$$\begin{aligned} (A_2) &= \mathbb{E}_t \left[ (\Theta_{t-\tau(\beta_t)} - \Theta^*)^\top \{ [(A(X_t) - A)\Theta_{t-\tau(\beta_t)} + b(X_t) - b] + (A(X_t) - A)(\Theta_t - \Theta_{t-\tau(\beta_t)}) \} \right] \\ &\leq \underbrace{|\ (\Theta_{t-\tau(\beta_t)} - \Theta^*)^\top \mathbb{E}_t [(A(X_t) - A)\Theta_{t-\tau(\beta_t)} + b(X_t) - b] \ |}_{(A_{2,1})} \\ &\quad + \underbrace{|\ (\Theta_{t-\tau(\beta_t)} - \Theta^*)^\top \mathbb{E}_t [(A(X_t) - A)(\Theta_t - \Theta_{t-\tau(\beta_t)})] \ |}_{(A_{2,2})} \end{aligned}$$

Since

$$\begin{aligned}
(A_{2,1}) &\leq \|\Theta_{t-\tau(\beta_t)} - \Theta^*\|_2 (\|\mathbb{E}_t[A(X_t)] - A\|_2 \|\Theta_{t-\tau(\beta_t)}\|_2 + \|\mathbb{E}_t[b(X_t)] - b\|_2) \\
&\leq \beta_t \mathbb{E}_t [\|\Theta_{t-\tau(\beta_t)} - \Theta^*\|_2 (\|\Theta_{t-\tau(\beta_t)}\|_2 + 1)] \\
&= \beta_t \mathbb{E}_t [\|\Theta_{t-\tau(\beta_t)} - \Theta_t + \Theta_t - \Theta^*\|_2 (\|\Theta_{t-\tau(\beta_t)} - \Theta_t + \Theta_t - \Theta^* + \Theta^*\|_2 + 1)] \\
&\leq \beta_t \mathbb{E}_t [(\|\Theta_t - \Theta_{t-\tau(\beta_t)}\|_2 + \|\Theta_t - \Theta^*\|_2) (\|\Theta_t - \Theta_{t-\tau(\beta_t)}\|_2 + \|\Theta_t - \Theta^*\|_2 + \|\Theta^*\|_2 + 1)] \\
&\leq \beta_t \mathbb{E}_t [(\|\Theta_t\|_2 + \|\Theta_t - \Theta^*\|_2 + 1) (\|\Theta_t\|_2 + \|\Theta_t - \Theta^*\|_2 + \|\Theta^*\|_2 + 2)] \\
&\leq \beta_t \mathbb{E}_t [(\|\Theta^*\|_2 + 2\|\Theta_t - \Theta^*\|_2 + 1) (2\|\Theta_t - \Theta^*\|_2 + 2\|\Theta^*\|_2 + 2)] \\
&\leq 4\beta_t \mathbb{E}_t [(\|\Theta_t - \Theta^*\|_2 + \|\Theta^*\|_2 + 1)^2] \\
&\leq 8\beta_t \mathbb{E}_t [\|\Theta_t - \Theta^*\|_2^2 + (\|\Theta^*\|_2 + 1)^2] \\
&\leq 8\eta^2 \beta_{t-\tau(\beta_t), t-1} \mathbb{E}_t [\|\Theta_t - \Theta^*\|_2^2 + (\|\Theta^*\|_2 + 1)^2]
\end{aligned}$$

The 4th inequality holds because for any  $0 \leq t_1 < t_2$  satisfying  $\beta_{t_1, t_2-1} \leq \frac{1}{4\eta}$ , the following inequality (see lemma 2.3 in [16] for a proof) hold:

$$\|\Theta_{t_2} - \Theta_{t_1}\|_2 \leq \|\Theta_{t_2}\|_2 + 1.$$

Since we have assumed that  $\beta_{t-\tau(\beta_t), t-1} \leq \frac{1}{4\eta}$ , then we have  $\|\Theta_t - \Theta_{t-\tau(\beta_t)}\|_2 \leq \|\Theta_t\|_2 + 1$ . Thus,  $\beta_t \mathbb{E}_t [(\|\Theta_t - \Theta_{t-\tau(\beta_t)}\|_2 + \|\Theta_t - \Theta^*\|_2) (\|\Theta_t - \Theta_{t-\tau(\beta_t)}\|_2 + \|\Theta_t - \Theta^*\|_2 + \|\Theta^*\|_2 + 1)] \leq \beta_t \mathbb{E}_t [(\|\Theta_t\|_2 + \|\Theta_t - \Theta^*\|_2 + 1) (\|\Theta_t\|_2 + \|\Theta_t - \Theta^*\|_2 + \|\Theta^*\|_2 + 2)]$ .

$$\begin{aligned}
(A_{2,2}) &\leq 2\eta \mathbb{E}_t [\|\Theta_{t-\tau(\beta_t)} - \Theta^*\|_2 \|\Theta_t - \Theta_{t-\tau(\beta_t)}\|_2] \\
&\leq 8\eta^2 \beta_{t-\tau(\beta_t), t-1} \mathbb{E}_t [\|\Theta_{t-\tau(\beta_t)} - \Theta^*\|_2 (\|\Theta_t\|_2 + 1)] \\
&\leq 8\eta^2 \beta_{t-\tau(\beta_t), t-1} \mathbb{E}_t [(\|\Theta_t - \Theta_{t-\tau(\beta_t)}\|_2 + \|\Theta_t - \Theta^*\|_2) (\|\Theta_t\|_2 + 1)] \\
&\leq 8\eta^2 \beta_{t-\tau(\beta_t), t-1} \mathbb{E}_t [(\|\Theta_t - \Theta_{t-\tau(\beta_t)}\|_2 + \|\Theta_t - \Theta^*\|_2) (\|\Theta_t\|_2 + 1)] \\
&\leq 8\eta^2 \beta_{t-\tau(\beta_t), t-1} \mathbb{E}_t [(\|\Theta_t\|_2 + \|\Theta_t - \Theta^*\|_2 + 1) (\|\Theta_t\|_2 + 1)] \\
&\leq 8\eta^2 \beta_{t-\tau(\beta_t), t-1} \mathbb{E}_t [(\|\Theta^*\|_2 + 2\|\Theta_t - \Theta^*\|_2 + 1) (\|\Theta^*\|_2 + \|\Theta_t - \Theta^*\|_2 + 1)] \\
&\leq 16\eta^2 \beta_{t-\tau(\beta_t), t-1} \mathbb{E}_t [(\|\Theta_t - \Theta^*\|_2 + \|\Theta^*\|_2 + 1)^2] \\
&\leq 32\eta^2 \beta_{t-\tau(\beta_t), t-1} \mathbb{E}_t [\|\Theta_t - \Theta^*\|_2^2 + (\|\Theta^*\|_2 + 1)^2],
\end{aligned}$$

then we have

$$\begin{aligned}
(A_2) &= (A_{2,1}) + (A_{2,2}) \\
&\leq 40\eta^2 \beta_{t-\tau(\beta_t), t-1} \mathbb{E}_t [\|\Theta_t - \Theta^*\|_2^2 + (\|\Theta^*\|_2 + 1)^2].
\end{aligned}$$

Finally,

$$\begin{aligned}
(A) &= (A_1) + (A_2) \\
&\leq 56\eta^2 \beta_{t-\tau(\beta_t), t-1} \mathbb{E}_t [\|\Theta_t - \Theta^*\|_2^2 + (\|\Theta^*\|_2 + 1)^2]
\end{aligned}$$

**step 4. Putting together.**

$$\begin{aligned}
&\mathbb{E}_t [\|\Theta_{t+1} - \Theta^*\|_2^2 - \|\Theta_t - \Theta^*\|_2^2] \\
&\leq 2\eta^2 \beta_t \beta_{t-\tau(\beta_t), t-1} \mathbb{E}_t [\|\Theta_t - \Theta^*\|_2^2 + (\|\Theta^*\|_2 + 1)^2] \\
&\quad + 112\eta^2 \beta_t \beta_{t-\tau(\beta_t), t-1} \mathbb{E}_t [\|\Theta_t - \Theta^*\|_2^2 + (\|\Theta^*\|_2 + 1)^2] \\
&\quad - \Delta \beta_t \mathbb{E}_t [\|\Theta_t - \Theta^*\|_2^2] \\
&\leq (114\eta^2 \beta_t \beta_{t-\tau(\beta_t), t-1} - \Delta \beta_t) \mathbb{E}_t [\|\Theta_t - \Theta^*\|_2^2] + 114\eta^2 (\|\Theta^*\|_2 + 1)^2 \beta_t \beta_{t-\tau(\beta_t), t-1}
\end{aligned}$$

Hence, for any  $t \geq t^*$ , we have

$$\begin{aligned} \mathbb{E} [\|\Theta_{t+1} - \Theta^*\|_2^2] &\leq (1 + 114\eta^2 \beta_t \beta_{t-\tau(\beta_t), t-1} - \Delta \beta_t) \mathbb{E} [\|\Theta_t - \Theta^*\|_2^2] \\ &\quad + 114\eta^2 (\|\Theta^*\|_2 + 1)^2 \beta_t \beta_{t-\tau(\beta_t), t-1}. \end{aligned}$$

Since for any  $t \geq t^*$  we have assumed

$$\beta_{t-\tau(\beta_t), t-1} \leq \frac{\Delta}{228\eta^2}, \text{ i.e., } 228\eta^2 \beta_t \beta_{t-\tau(\beta_t), t-1} - \Delta \beta_t \leq 0,$$

and

$$\frac{\beta_{t-\tau(\beta_t), t-1}}{\tau(\beta_t) \beta_t} \leq 2, \text{ i.e., } \beta_t \beta_{t-\tau(\beta_t), t-1} \leq 2\tau(\beta_t) \beta_t^2$$

then

$$\mathbb{E} [\|\Theta_{t+1} - \Theta^*\|_2^2] \leq \left(1 - \frac{\Delta}{2} \beta_t\right) \mathbb{E} [\|\Theta_t - \Theta^*\|_2^2] + \frac{\xi_2}{2} \tau(\beta_t) \beta_t^2$$

Recursively using the preceding inequality, we have for all  $T \geq t^*$

$$\mathbb{E} [\|\Theta_T - \Theta^*\|_2^2] \leq \mathbb{E} [\|\Theta_{t^*} - \Theta^*\|_2^2] \prod_{t=t^*}^{T-1} \left(1 - \frac{\Delta}{2} \beta_t\right) + \frac{\xi_2}{2} \sum_{t=t^*}^{T-1} \tau(\beta_t) \beta_t^2 \prod_{j=t+1}^{T-1} \left(1 - \frac{\Delta}{2} \beta_j\right).$$

Since we have assumed that  $\beta_{0, t^*-1} \leq \frac{1}{2\eta}$ , then we have

$$\begin{aligned} \mathbb{E} [\|\Theta_{t^*} - \Theta^*\|_2^2] &\leq \mathbb{E} [(\|\Theta_{t^*} - \Theta_0\|_2 + \|\Theta_0 - \Theta^*\|_2)^2] \\ &\leq (\|\Theta_0\|_2 + \|\Theta_0 - \Theta^*\|_2 + 1)^2 \\ &= \xi_1, \end{aligned}$$

which gives the desired finite-time bound:

$$\mathbb{E} [\|\Theta_T - \Theta^*\|_2^2] \leq \xi_1 \prod_{t=t^*}^{T-1} \left(1 - \frac{\Delta}{2} \beta_t\right) + \frac{\xi_2}{2} \sum_{t=t^*}^{T-1} \tau(\beta_t) \beta_t^2 \prod_{j=t+1}^{T-1} \left(1 - \frac{\Delta}{2} \beta_j\right).$$

**Part (3): Theorem 1(a).** Since

$$\prod_{t=\tau(\beta)}^{T-1} \left(1 - \frac{\Delta}{2} \beta\right) = \left(1 - \frac{\Delta}{2} \beta\right)^{T-\tau(\beta)},$$

and

$$\begin{aligned} \sum_{t=\tau(\beta)}^{T-1} \tau(\beta) \beta^2 \prod_{j=t+1}^{T-1} \left(1 - \frac{\Delta}{2} \beta\right) &= \beta^2 \tau(\beta) \sum_{j=\tau(\beta)}^{T-1} \left(1 - \frac{\Delta}{2} \beta\right)^{T-j-1} \\ &\leq \beta^2 \tau(\beta) \sum_{j=0}^{\infty} \left(1 - \frac{\Delta}{2} \beta\right)^j \\ &\leq \frac{\beta \tau(\beta)}{\frac{\Delta}{2}}, \end{aligned}$$

then we have for all  $T \geq \tau(\beta)$

$$\begin{aligned} &\mathbb{E} [(\bar{r}_T - r(\mu))^2] + \mathbb{E} [\|\Pi_{2,E}(\theta_T - \theta^*)\|_2^2] \\ &= \mathbb{E} [\|\Theta_T - \Theta^*\|_2^2] \\ &\leq \xi_1 \left(1 - \frac{\Delta}{2} \beta\right)^{T-\tau(\beta)} + \xi_2 \frac{\beta \tau(\beta)}{\Delta}. \end{aligned}$$

**Part (4): Theorem 1(b).** We first bound the term  $\prod_{t=t^*}^{T-1} \left(1 - \frac{\Delta}{2} \beta_t\right)$ .

$$\begin{aligned} \prod_{t=t^*}^{T-1} \left(1 - \frac{\Delta}{2} \beta_t\right) &= \prod_{t=t^*}^{T-1} \left(1 - \frac{\Delta}{2} \frac{c_1}{t + c_2}\right) \\ &\leq \prod_{t=t^*}^{T-1} e^{-\frac{\Delta}{2} \frac{c_1}{t + c_2}} \\ &= e^{-\frac{\Delta}{2} c_1 \sum_{t=t^*}^{T-1} \frac{1}{t + c_2}} \end{aligned}$$

Since

$$\begin{aligned} \sum_{t=t^*}^{T-1} \frac{1}{t + c_2} &\geq \int_{t^*}^T \frac{1}{x + c_2} dx \\ &= \ln \left( \frac{T + c_2}{t^* + c_2} \right), \end{aligned}$$

then we have

$$\begin{aligned} \prod_{t=t^*}^{T-1} \left(1 - \frac{\Delta}{2} \beta_t\right) &\leq e^{-\frac{\Delta}{2} c_1 \ln \left( \frac{T + c_2}{t^* + c_2} \right)} \\ &= \left( \frac{t^* + c_2}{T + c_2} \right)^{\frac{\Delta}{2} c_1}. \end{aligned}$$

Next we bound the term  $\sum_{t=t^*}^{T-1} \tau(\beta_t) \beta_t^2 \prod_{j=t+1}^{T-1} \left(1 - \frac{\Delta}{2} \beta_j\right)$ .

Since  $\tau_{\beta_t} \leq \tau_{\beta_T} \leq K \ln \left( \frac{1}{\beta_T} \right) = K [\ln(T + c_2) - \ln(c_1)]$  for all  $t^* \leq t \leq T - 1$ , we have

$$\sum_{t=t^*}^{T-1} \tau(\beta_t) \beta_t^2 \prod_{j=t+1}^{T-1} \left(1 - \frac{\Delta}{2} \beta_j\right) \leq K [\ln(T + c_2) - \ln(c_1)] \sum_{t=t^*}^{T-1} \beta_t^2 \prod_{j=t+1}^{T-1} \left(1 - \frac{\Delta}{2} \beta_j\right).$$

Moreover,

$$\begin{aligned} \prod_{j=t+1}^{T-1} \left(1 - \frac{\Delta}{2} \frac{c_1}{j + c_2}\right) &\leq e^{-\frac{\Delta}{2} c_1 \sum_{j=t+1}^{T-1} \frac{1}{j + c_2}} \\ &\leq \left( \frac{t + c_2 + 1}{T + c_2} \right)^{\frac{\Delta}{2} c_1} \end{aligned}$$

Then,

$$\begin{aligned} \sum_{t=t^*}^{T-1} \beta_t^2 \prod_{j=t+1}^{T-1} \left(1 - \frac{\Delta}{2} \beta_j\right) &= \sum_{t=t^*}^{T-1} \frac{c_1^2}{(t + c_2)^2} \prod_{j=t+1}^{T-1} \left(1 - \frac{\Delta}{2} \frac{c_1}{j + c_2}\right) \\ &\leq \sum_{t=t^*}^{T-1} \frac{c_1^2}{(t + c_2)^2} \left( \frac{t + c_2 + 1}{T + c_2} \right)^{\frac{\Delta}{2} c_1} \\ &= \frac{c_1^2}{(T + c_2)^{\frac{\Delta}{2} c_1}} \sum_{t=t^*}^{T-1} \left( \frac{t + c_2 + 1}{t + c_2} \right)^2 (t + c_2 + 1)^{\frac{\Delta}{2} c_1 - 2} \\ &\leq \frac{4c_1^2}{(T + c_2)^{\frac{\Delta}{2} c_1}} \sum_{t=t^*}^{T-1} (t + c_2 + 1)^{\frac{\Delta}{2} c_1 - 2} \end{aligned}$$

When  $\frac{\Delta}{2}c_1 > 1$ , we have

$$\begin{aligned} \sum_{t=t^*}^{T-1} (t + c_2 + 1)^{\frac{\Delta}{2}c_1-2} &\leq \int_0^T (x + c_2 + 1)^{\frac{\Delta}{2}c_1-2} dx \\ &= \frac{1}{\frac{\Delta}{2}c_1 - 1} \left[ (T + c_2 + 1)^{\frac{\Delta}{2}c_1-1} - (c_2 + 1)^{\frac{\Delta}{2}c_1-1} \right] \\ &\leq \frac{1}{\frac{\Delta}{2}c_1 - 1} (T + c_2 + 1)^{\frac{\Delta}{2}c_1-1} \end{aligned}$$

Therefore,

$$\begin{aligned} \sum_{t=t^*}^{T-1} \beta_t^2 \prod_{j=t+1}^{T-1} \left( 1 - \frac{\Delta}{2} \beta_j \right) &\leq \frac{4c_1^2}{\frac{\Delta}{2}c_1 - 1} \frac{1}{T + c_2 + 1} \left( \frac{T + c_2 + 1}{T + c_2} \right)^{\frac{\Delta}{2}c_1} \\ &\leq \frac{4c_1^2}{\frac{\Delta}{2}c_1 - 1} \frac{1}{T + c_2 + 1} e^{\frac{\frac{\Delta}{2}c_1}{T+c_2}} \\ &= \frac{4c_1^2}{\frac{\Delta}{2}c_1 - 1} \frac{1}{T + c_2 + 1} e^{\frac{\Delta}{2}\beta_T} \end{aligned}$$

Since

$$\frac{\Delta}{2}\beta_T \leq \frac{\Delta}{2}\beta_0 < 1,$$

we have

$$\sum_{t=t^*}^{T-1} \beta_t^2 \prod_{j=t+1}^{T-1} \left( 1 - \frac{\Delta}{2} \beta_j \right) \leq \frac{4ec_1^2}{\frac{\Delta}{2}c_1 - 1} \frac{1}{T + c_2 + 1}$$

Hence,

$$\begin{aligned} &\mathbb{E} \left[ (\bar{r}_T - r(\mu))^2 \right] + \mathbb{E} \left[ \|\Pi_{2,E}(\theta_T - \theta^*)\|_2^2 \right] \\ &= \mathbb{E} \left[ \|\Theta_T - \Theta^*\|_2^2 \right] \\ &\leq \xi_1 \left( \frac{t^* + c_2}{T + c_2} \right)^{\frac{\Delta}{2}c_1} + \xi_2 \frac{8ec_1^2 K}{\Delta c_1 - 2} \frac{\ln(T + c_2) - \ln(c_1)}{T + c_2 + 1} \end{aligned}$$

□

#### A.4 Proof of Corollary 1

*Proof.* For the diminishing step-size  $\beta_t = \frac{c_1}{t+c_2}$ , we choose  $c_1 := \frac{4}{\Delta}$ ,  $c_2 := 4$  and  $c_\alpha := \Delta + \frac{1}{\Delta(1-\lambda)^2}$ . Then, from Theorem 1 (b), we have

$$\mathbb{E} \left[ (\bar{r}_T - r(\mu))^2 \right] + \mathbb{E} \left[ \|\Pi_{2,E}(\theta_T - \theta^*)\|_2^2 \right] \leq \xi_1 \left( \frac{t^* + 4}{T + 4} \right)^2 + \frac{64eK\xi_2}{\Delta^2} \frac{\ln(T + 4) - \ln(\frac{4}{\Delta})}{T + 5}.$$

For any  $\epsilon > 0$ , to guarantee that  $\mathbb{E} [|\bar{r}_T - r(\mu)|] \leq \epsilon$  and  $\mathbb{E} [\|\Pi_{2,E}(\theta_T - \theta^*)\|_2] \leq \epsilon$ , we can set

$$\xi_1 \left( \frac{t^* + 4}{T + 4} \right)^2 \leq \frac{1}{2}\epsilon^2,$$

and

$$\frac{64eK\xi_2}{\Delta^2} \frac{\ln(T + 4) - \ln(\frac{4}{\Delta})}{T + 5} \leq \frac{1}{2}\epsilon^2$$

Then  $T$  needs to satisfy

$$T = \tilde{\mathcal{O}} \left( \frac{K \log \left( \frac{1}{\Delta} \right) \left( 1 + \|\theta^*\|_2^2 \right)}{\Delta^4 (1 - \lambda)^4 \epsilon^2} \right)$$

□

## B Convergence with respect to Span Lyapunov Function

The main difficulty for analyzing average reward is the existence of some subspace  $\bar{E}$  for which the Bellman operator  $H$  is indifferent, i.e.,

$$H(Q + x) - H(Q) \in \bar{E}, \quad \forall x \in \bar{E}$$

So it is impossible to apply the finite time analysis in the literature to establish the convergence of the iterates to some fix point. In essence,  $H$  operates on sets of points defined by the indifferent subspace called equivalent classes:

$$\mathcal{X}_{\bar{E}} := \{x_{\bar{E}} | x \in \mathbb{R}^n\},$$

where  $x_{\bar{E}} := \{y \in \mathbb{R}^n : y - x \in \bar{E}\}$ . Thus we should analyze those equivalent classes rather than the points. Towards that end, we propose a new kind of Lyapunov function defined with respect to  $\mathcal{X}_{\bar{E}}$ .

### B.1 The Semi-Lyapunov Function

We tweak the smooth convex Lyapunov function  $M$  introduced in [18] to build a new Lyapunov function. Recall that  $M$  satisfies the following two important properties with respect to a smoothness norm  $\|\cdot\|_s$  and a contraction norm  $\|\cdot\|_c$ :

1. Smoothness:  $M(y) \leq M(x) + \langle \nabla M(x), y - x \rangle + \frac{L}{2} \|y - x\|_s^2, \forall x, y$  for some  $L \geq 0$ .
2. Uniform Approximation: For some constants  $c_l, c_u \geq 0$ , we have

$$c_l M(x) \leq \frac{1}{2} \|x\|_c^2 \leq c_u M(x) \quad \forall x \quad (\text{B.1})$$

Next we construct a Lyapunov function satisfying the above two properties with respect to equivalent classes. Consider the following span norm induced by  $\bar{E}$  [44]:

$$\|x\|_{c,\bar{E}} := \inf_{e \in \bar{E}} \|x - e\|_c, \quad \|x\|_{s,\bar{E}} := \inf_{e \in \bar{E}} \|x - e\|_s.$$

Clearly they are functions defined on  $\mathcal{X}_{\bar{E}}$  since any element of an equivalent class  $x_{\bar{E}}$  is mapped to the same value.

A key observation is that they could be expressed equivalently as the infimal convolution with respect to indicator functions. More specifically, if  $\delta_{\bar{E}}$  denote the indicator function with respect  $\bar{E}$ ,

$$\delta_{\bar{E}}(x) := \begin{cases} 0 & x \in \bar{E}, \\ \infty & \text{otherwise.} \end{cases} \quad (\text{B.2})$$

Then  $\|x\|_{c,\bar{E}} \equiv (\|\cdot\|_c \square \delta_{\bar{E}})(x)$ ,  $\|x\|_{s,\bar{E}} \equiv (\|\cdot\|_s \square \delta_{\bar{E}})(x)$ . Indeed, our new Lyapunov function  $M_{\bar{E}}$  is defined as

$$M_{\bar{E}}(x) := \inf_y M(x - y) + \delta_{\bar{E}}(y) \equiv M \square \delta_{\bar{E}}(x). \quad (\text{B.3})$$

We call it a *semi-Lyapunov function* because  $M_{\bar{E}}(x) = 0 \quad \forall x \in \bar{E}$ . Notice that function  $M_{\bar{E}}$  is a well-defined over  $\mathcal{X}_{\bar{E}}$ .

Now we show that  $M_{\bar{E}}$  is a uniform approximation to the induced contraction norm  $\|\cdot\|_{c,\bar{E}}$  and that it is smooth with respect to the induced smoothness norm  $\|\cdot\|_{s,\bar{E}}$ . First, the following properties for infimal convolution of an indicator function can be derived easily from the definition of infimal convolution.

**Lemma 4.** *Let  $\bar{E}$  be a linear subspace in  $\mathbb{R}^n$  and let  $\delta_{\bar{E}}$  be the indicator function associated with it (B.2). Then the following properties hold.*

- a) *Monotonicity:* If  $f(x) \geq g(x)$ , then  $f \square \delta_{\bar{E}}(x) \geq g \square \delta_{\bar{E}}(x)$ .
- b) *Scaling Invariance:*  $(\beta f) \square \delta_{\bar{E}} \equiv \beta(f \square \delta_{\bar{E}})$  for any non-negative scalar  $\beta$ .
- c) *Commutativity*  $f \square g \equiv g \square f$ .
- d) *Associativity:*  $(f \square g) \square h \equiv f \square (g \square h)$ .

e)  $\delta_{\bar{E}} \square \delta_{\bar{E}} \equiv \delta_{\bar{E}}$ .

f) If  $f$  is  $L$ -smooth with respect to  $\|\cdot\|_s$ , then  $f \square \delta_{\bar{E}}$  is also smooth with respect to  $\|\cdot\|_s$ .

g) If  $f$  is convex, then  $f \square \delta_{\bar{E}}$  is also convex.

*Proof.* Properties f) and g) are the smoothing properties of infimal convolution and their derivations can be found in [45].  $\square$

Then the uniform approximation property of  $M_{\bar{E}}$  follows from that of  $M$ .

**Proposition 1.** If  $M$  satisfies  $c_l M(x) \leq \frac{1}{2} \|x\|_c^2 \leq c_u M(x)$  for some constants  $c_l, c_u$ , then  $M_{\bar{E}}$  defined in (B.3) satisfies

$$c_l M_{\bar{E}}(x) \leq \frac{1}{2} \|x\|_{c,\bar{E}}^2 \leq c_u M_{\bar{E}}(x), \quad \forall x. \quad (\text{B.4})$$

*Proof.* By the monotonicity of square for positive scalar, we have

$$\|x\|_{c,\bar{E}}^2 = (\inf_y \|x - y\|_c + \delta_{\bar{E}}(y))^2 = \inf_y (\|x - y\|_c + \delta_{\bar{E}}(y))^2 \stackrel{(a)}{=} \inf_y \|x - y\|_c^2 + \delta_{\bar{E}}(y) = \|\cdot\|_c^2 \square \delta_{\bar{E}},$$

where (a) follows from  $\delta_{\bar{E}}$  being a support function. The monotonicity of the infimal convolution Lemma 4.a) implies that

$$(c_l M) \square \delta_{\bar{E}}(x) \leq \frac{1}{2} \|\cdot\|_c^2 \square \delta_{\bar{E}}(x) \leq (c_u M) \square \delta_{\bar{E}}(x), \quad \forall x.$$

So the Lemma 4.b) implies

$$c_l (M \square \delta_{\bar{E}})(x) \leq \frac{1}{2} \|\cdot\|_{c,\bar{E}}^2(x) \leq c_u (M \square \delta_{\bar{E}})(x), \quad \forall x,$$

i.e.,

$$c_l M_{\bar{E}}(x) \leq \frac{1}{2} \|x\|_{c,\bar{E}}^2 \leq c_u M_{\bar{E}}(x), \quad \forall x.$$

$\square$

Moreover the smoothness of  $M_{\bar{E}}$  also follows from that of  $M$ .

**Proposition 2.** If  $M$  is  $L$ -smooth with respect to  $\|\cdot\|_s$ ,

$$M(y) \leq M(x) + \langle \nabla M(x), y - x \rangle + \frac{L}{2} \|y - x\|_s^2, \quad \forall x, y,$$

then  $M_{\bar{E}}$  is  $L$ -smooth with respect to  $\|\cdot\|_{s,\bar{E}}$ , i.e., i.e.,

$$M_{\bar{E}}(y) \leq M_{\bar{E}}(x) + \langle \nabla M_{\bar{E}}(x), y - x \rangle + \frac{L}{2} \|y - x\|_{s,\bar{E}}^2, \quad \forall x, y.$$

Moreover, the gradient of  $M_{\bar{E}}$  satisfies  $\langle \nabla M_{\bar{E}}(x), e \rangle = 0 \quad \forall e \in E, \forall x$ .

*Proof.*  $\langle \nabla M_{\bar{E}}(x), e \rangle = 0, \forall e \in E$  clearly holds because  $M_{\bar{E}}$  always have the same value for any elements of  $x_{\bar{E}}$ . Now we show the smoothness property. First, by Lemma 4.f), if  $M$  is  $L$ -smooth with respect to  $\|\cdot\|_s$ , then  $M_{\bar{E}}$  must also be  $L$ -smooth with respect to  $\|\cdot\|_s$ . Now consider arbitrary  $x, y \in \mathbb{R}^n$ . Let  $\hat{e} = \arg \min_{e \in E} \|x - y - e\|_s$ , i.e.,  $\|x - y - \hat{e}\|_s = \|x - y\|_{s,\bar{E}}$ . Then

$$\begin{aligned} M_{\bar{E}}(x) &= M_{\bar{E}}(x + \hat{e}) \stackrel{(a)}{\leq} M_{\bar{E}}(y) + \langle \nabla M_{\bar{E}}(y), x + \hat{e} - y \rangle + \frac{L}{2} \|x + \hat{e} - y\|_s^2 \\ &= M_{\bar{E}}(y) + \langle \nabla M_{\bar{E}}(y), x - y \rangle + \frac{L}{2} \|x - y\|_{s,\bar{E}}^2, \end{aligned}$$

where (a) follows from the  $L$ -smoothness of  $M_{\bar{E}}$  with respect to  $\|\cdot\|_s$ .  $\square$

## B.2 Recursive Bounds of the General Stochastic Approximation Scheme

Now let's analyze the iterates generated by the following stochastic approximation scheme for solving some fixed equivalent class equation  $H(x) - x \in \bar{E}$ :

$$x^{t+1} \leftarrow x^t + \eta_t(\hat{H}(x^t) - x^t), \quad (\text{B.5})$$

We make the following assumptions regarding the function  $H$  and its stochastic sample  $\hat{H}$ .

**Assumption 4.**

1.  $H$  is  $\gamma$ -contractive with respect to  $\|\cdot\|_{c,\bar{E}}$  for some  $\gamma < 1$ , i.e.,  $\|H(x) - H(y)\|_{c,\bar{E}} \leq \gamma \|x - y\|_{c,\bar{E}}$ .
2. Let  $w^t := \hat{H}(x^t) - H(x^t)$  denote the stochastic error associated with  $\hat{H}$  at iteration  $t$  and let  $\mathcal{F}^t := \{x^1, \dots, x^t\}$  denote the filtration up to time  $t$ . Then  $w^t$  satisfies the following properties,
  - *Martingale noise*:  $\mathbb{E}[w^t | \mathcal{F}^t] = 0$ .
  - *Bounded variance*:  $\mathbb{E}[\|w^t\|_{c,\bar{E}}^2 | \mathcal{F}^t] \leq A + B \|x^t - x^*\|_{c,\bar{E}}^2$  for some fixed constants  $A$  and  $B$ .
3. There exist a fixed equivalent class, i.e.,  $x^*$  for which  $\|H(x^*) - x^*\|_{c,\bar{E}} = 0$ .

We begin by analyzing the behavior of  $M_{\bar{E}}$  for a fixed  $t$  using its L-smoothness property shown in Proposition 2:

$$M_{\bar{E}}(x^{t+1} - x^*) \leq M_{\bar{E}}(x^t - x^*) + \langle \nabla M_{\bar{E}}(x^t - x^*), x^{t+1} - x^t \rangle + \frac{L}{2} \|x^{t+1} - x^t\|_{s,\bar{E}}^2. \quad (\text{B.6})$$

First, we show the linear term above induces a negative drift.

**Lemma 5.** Let  $M_{\bar{E}}$  be defined in (B.3). Then conditioned on  $\mathcal{F}^t$ ,  $x^{t+1}$  satisfies

$$\mathbb{E}[\langle \nabla M_{\bar{E}}(x^t - x^*), x^{t+1} - x^t \rangle] \leq -2\beta\eta_t M_{\bar{E}}(x^t - x^*),$$

with  $\beta \geq (1 - \gamma\sqrt{c_u/c_l})$ , where  $c_u, c_l$  are the uniform approximation parameters of  $M$  defined in (B.1).

*Proof.* First, due to the martingale noise assumption for  $\hat{H}$ , the following relation holds conditioned on  $\mathcal{F}^t$ ,

$$\mathbb{E}[\langle \nabla M_{\bar{E}}(x^t - x^*), x^{t+1} - x^t \rangle] = \eta_t \mathbb{E}[\langle \nabla M_{\bar{E}}(x^t - x^*), H(x^t) - x^t + w^t \rangle] = \eta_t \langle \nabla M_{\bar{E}}(x^t - x^*), H(x^t) - x^t \rangle.$$

Now we study the last term. The convexity of  $M_{\bar{E}}$  implies that

$$\begin{aligned} \langle \nabla M_{\bar{E}}(x^t - x^*), H(x^t) - x^t \rangle &= \langle \nabla M_{\bar{E}}(x^t - x^*), H(x^t) - x^* + x^* - x^t \rangle \\ &\leq M_{\bar{E}}(H(x^t) - x^*) - M_{\bar{E}}(x^t - x^*) \\ &\stackrel{(a)}{\leq} \frac{1}{2c_l} \|H(x^t) - H(x^*)\|_{c,\bar{E}}^2 - M_{\bar{E}}(x^t - x^*) \\ &\stackrel{(b)}{\leq} \frac{\gamma^2}{2c_l} \|x^t - x^*\|_{c,\bar{E}}^2 - M_{\bar{E}}(x^t - x^*) \\ &\leq (\frac{\gamma^2 c_u}{c_l} - 1) M_{\bar{E}}(x^t - x^*) \leq -(1 - \gamma\sqrt{c_u/c_l}) M_{\bar{E}}(x^t - x^*), \end{aligned}$$

where (a) follows from  $x^*$  belonging to a fixed equivalent class with respect to  $H$  and (b) follows from the contraction property of  $H$ .  $\square$

Now let's focus on the last term in (B.6). In [18], the authors utilize norm equivalence to upper bound  $\|x\|_s^2$  by some  $l_s \|x\|_c^2$  so that it could be bounded by  $M$ . We apply the same technique in the next lemma. Notice that the monotonicity of infimal convolution (Lemma 4.a) and Lemma 4.b)) implies that  $\|x\|_{s,\bar{E}}^2 \leq l_s \|x\|_{c,\bar{E}}^2$ .

**Lemma 6.** If  $\|x\|_{s,\bar{E}}^2 \leq l_s \|x\|_{c,\bar{E}}^2$ , then conditioned on  $\mathcal{F}^t$ ,  $x^{t+1}$  generated by (B.5) satisfies

$$\mathbb{E}[\|x^{t+1} - x^t\|_{s,\bar{E}}^2] \leq (16 + 4B)c_u l_s \eta_t^2 M_{\bar{E}}(x^t - x^*) + 2Al_s \eta_t^2.$$

*Proof.* By update rule (B.5), we have

$$\begin{aligned} \mathbb{E}[\|x^{t+1} - x^t\|_{s,\bar{E}}^2] &= \eta_t^2 \mathbb{E}[\|H(x^t) + w^t - x^t\|_{s,\bar{E}}^2] \\ &\stackrel{(a)}{\leq} 2\eta_t^2 \mathbb{E}[\|H(x^t) - x^t\|_{s,\bar{E}}^2 + \|w^t\|_{s,\bar{E}}^2] \\ &\leq 2\eta_t^2 l_s \mathbb{E}[\|H(x^t) - x^t\|_{c,\bar{E}}^2 + \|w^t\|_{c,\bar{E}}^2] \\ &\leq 2\eta_t^2 l_s \mathbb{E}[2\|H(x^t) - H(x^*)\|_{c,\bar{E}}^2 + 2\|x^t - x^*\|_{c,\bar{E}}^2 + \|w^t\|_{c,\bar{E}}^2] \\ &\leq \eta_t^2 l_s (8 + 2B) \|x^t - x^*\|_{c,\bar{E}}^2 + \eta_t^2 l_s 2A \\ &\stackrel{(b)}{\leq} \eta_t^2 l_s c_u (16 + 4B) M_{\bar{E}}(x^t - x^*) + \eta_t^2 l_s 2A, \end{aligned}$$

where (a) follows from the triangle inequality and (b) follows from the uniform approximation property of  $M_{\bar{E}}$ .  $\square$

Putting them together, we get the following recursive relation.

**Proposition 3.** Let  $x^t$  be generated by (B.5) using  $\hat{H}$  satisfying Assumption 4 and let  $\|x\|_{s,\bar{E}}^2 \leq l_s \|x\|_{c,\bar{E}}^2, \forall x$ . Then the following relation holds conditioned on  $\mathcal{F}^t$ ,

$$\mathbb{E}[M_{\bar{E}}(x^{t+1} - x^*)] \leq (1 - 2\alpha_2 \eta_t + \alpha_3 \eta_t^2) M_{\bar{E}}(x^t - x^*) + \alpha_4 \eta_t^2, \quad (\text{B.7})$$

where  $\alpha_2 := (1 - \gamma\sqrt{c_u/c_l})$ ,  $\alpha_3 := (8 + 2B)c_u l_s L$ ,  $\alpha_4 := Al_s L$ .

*Proof.* By substituting Lemma 5 and 6 into (B.6), we get  $\mathbb{E}[M_{\bar{E}}(x^{t+1} - x^*)] \leq (1 - 2\beta \eta_t + (8 + 2B)c_u l_s L \eta_t^2) M_{\bar{E}}(x^t - x^*) + Al_s \eta_t^2$ .  $\square$

Next, we suggest a specific stepsize  $\eta_t$  to calculate the convergence rate.

**Theorem 3.** Let  $\alpha_2$ ,  $\alpha_3$  and  $\alpha_4$  be defined in 3. If  $x^t$  is generated by (B.5) with an  $\hat{H}$  satisfying Assumption 4 and stepsizes  $\eta_t := \frac{1}{\alpha_2(t+K)}$ ,  $K := \max\{\alpha_3/\alpha_2, 3\}$ ,

$$\mathbb{E}[\|x^N - x^*\|_{c,\bar{E}}^2] \leq \frac{K^2}{(N+K)^2} \frac{c_u}{c_l} \|x^0 - x^*\|_{c,\bar{E}}^2 + \frac{8\alpha_4 c_u}{(N+K)\alpha_2^2}, \quad \forall N \geq 1. \quad (\text{B.8})$$

Else if a constant stepsize  $\eta$  with  $\eta_t \alpha_3 / \alpha_2 \leq 1$ , then

$$\mathbb{E}[\|x^N - x^*\|_{c,\bar{E}}^2] \leq \frac{c_u}{c_l} (1 - \alpha_2)^N \|x^0 - x^*\|_{c,\bar{E}}^2 + \frac{c_u \alpha_4}{\alpha_2} \eta, \quad \forall N \geq 1. \quad (\text{B.9})$$

*Proof.* Let's consider the decreasing stepsize first. Since  $\eta_t$  satisfies  $\alpha_3 \eta_t^2 \leq \alpha_2 \eta_t$ , it follows from (B.7) that

$$\mathbb{E}[M_{\bar{E}}(x^{t+1} - x^*)] \leq (1 - \alpha_2 \eta_t) M_{\bar{E}}(x^t - x^*) + \alpha_4 \eta_t^2.$$

By letting  $\Gamma_t := \prod_{i=0}^{t-1} (1 - \alpha_2 \eta_i)$ , we can obtain the  $N$ -step recursion relationship

$$\mathbb{E}[M_{\bar{E}}(x^{t+1} - x^*)] \leq \Gamma_N M_{\bar{E}}(x^t - x^*) + \frac{\alpha_4}{\alpha_2} \Gamma_N \sum_{i=0}^{N-1} \left(\frac{1}{\Gamma_{i+1}}\right) \alpha_2 \eta_i^2.$$

Then the algebraic relationship  $\frac{1}{\Gamma_{t+1}} (\alpha_2 \eta_t) = \frac{1}{\Gamma_{t+1}} - \frac{1}{\Gamma_t}$  implies that

$$\mathbb{E}[M_{\bar{E}}(x^{t+1} - x^*)] \leq \Gamma_N M_{\bar{E}}(x^t - x^*) + \frac{\alpha_4}{\alpha_2} \Gamma_N \sum_{i=0}^{N-1} \left(\frac{1}{\Gamma_{i+1}} - \frac{1}{\Gamma_i}\right) \eta_i.$$

Moreover a careful computation shows that

$$\Gamma_t = \frac{(K-1)(K-2)}{(t+K-1)(t+K-2)}, \Gamma_N \leq \frac{K^2}{(N+K)^2}, \Gamma_N \sum_{i=0}^{N-1} \eta_i \left(\frac{1}{\Gamma_{i+1}} - \frac{1}{\Gamma_i}\right) \leq \frac{4}{\alpha_2(N+K)}.$$

Thus we can conclude (B.8) by noting that  $M_{\bar{E}}$  is an uniform approximation of  $\|\cdot\|_{c,\bar{E}}$ , i.e.,  $c_l M_{\bar{E}}(x) \leq \frac{1}{2} \|x\|_{c,\bar{E}}^2 \leq c_u M_{\bar{E}}(x)$ .

Next, for the constant stepsize, again, we can recover from (B.7) that

$$\mathbb{E}[M_{\bar{E}}(x^{t+1} - x^*)] \leq (1 - \alpha_2 \eta) M_{\bar{E}}(x^t - x^*) + \alpha_4 \eta^2, \text{ i.e.,}$$

$$\mathbb{E}[M_{\bar{E}}(x^N - x^*)] \leq (1 - \alpha_2 \eta)^N M_{\bar{E}}(x^t - x^*) + \alpha_4 \eta^2 \sum_{t=0}^{N-1} (1 - \alpha_2 \eta)^t \leq (1 - \alpha_2 \eta)^N M_{\bar{E}}(x^t - x^*) + \frac{\alpha_4}{\alpha_2} \eta,$$

from which (B.9) follows naturally.  $\square$

### B.3 Convergence of the $J$ -step $Q$ -learning Algorithm

We establish the convergence of the  $J$ -step  $Q$ -learning algorithm in this subsection. With  $\bar{E} := \{ce : c \in \mathbb{R}\}$ , the sample  $J$ -step Bellman operator  $\hat{H}^J$  satisfies Assumption 4:

1.  $H^J$  is  $\gamma$ -contractive with respect to span infinite norm with  $0 < \gamma < 1$  i.e.,  $\|H^J(Q) - H^J(\bar{Q})\|_{\infty, \bar{E}} \leq \gamma \|Q - \bar{Q}\|_{\infty, E}$ .
2. Let  $w^t := \hat{H}^J(Q_t) - H^J(Q_t)$  denote the stochastic error associated with  $\hat{H}^J$  at iteration  $t$  and let  $\mathcal{F}^t := \{Q_1, \dots, Q_t\}$  denote the filtration up to time  $t$ . Then  $w^t$  satisfies the following properties,
  - Martingale noise:  $\mathbb{E}[w^t | \mathcal{F}^t] = 0$ .
  - Bounded variance:  $\mathbb{E}[\|w^t\|_{\infty, E}^2 | \mathcal{F}^t] \leq \underbrace{2(J^2 + \|Q^*\|_{\infty, E}^2)}_A + \underbrace{2}_{B} \|Q_t - Q^*\|_{\infty, E}^2$ .
3. There exists a gain optimal  $Q^*$  for which  $\|\hat{H}^J(Q^*) - Q^*\|_{\infty, E} = 0$ .

We choose the following  $l_\infty$ -norm smoothing function introduced in [18] as our base Lyapunov function

$$M(x) := \frac{1}{2} (\|x\|_\infty^2 \square \frac{1}{\mu} \|x\|_{4 \log |S||A|}^2), \text{ with } \mu = (\frac{1}{2} + \frac{1}{2\gamma})^2 - 1.$$

Then the following problem parameters for analyzing the convergence of the SA scheme can be derived:

$$c_u = (1 + \mu), c_l = (1 + \mu/\sqrt{e}), L = \frac{4 \log |S||A|}{\mu}, l_s = \sqrt{e}.$$

Following the same algebraic manipulation in Section A.6 of [18], we get

$$\begin{aligned} \alpha_1 &= c_u / c_l \leq \sqrt{e} \leq \frac{3}{2}, \\ \alpha_2 &= (1 - \gamma \sqrt{c_u / c_l}) \geq 1 - \gamma(1 + \mu)^{1/2} = \frac{1 - \gamma}{2}, \\ \alpha_3 &= (8 + 2B) c_u l_s L = 12 \frac{1 + \mu}{\mu} 4 \log(|S||A|) \sqrt{e} \leq \frac{144}{(1 - \gamma)} \log(|S||A|), \\ \alpha_4 c_u &= A c_u l_s L \leq 2(J^2 + \|Q^*\|_{\infty, E}^2) \frac{1 + \mu}{\mu} 4 \log(|S||A|) \leq \frac{24 \log(|S||A|)}{(1 - \gamma)} (J^2 + \|Q^*\|_{\infty, E}^2). \end{aligned}$$

Then the exact convergence rate of Algorithm 2 can be obtained by merely substituting them into Theorem 3. And the convergence and sample complexity Theorem 2 in the main text is a simple corollary of the next result.

**Proof. Proof of Theorem 2:** The result follows from merely substituting the above estimates into (B.9) and (B.8). In particular, the following conservative estimates are used for calculation

$$\alpha_1 = \frac{3}{2}, \alpha_2 = \frac{1 - \gamma}{2}, \alpha_3 = \frac{144}{(1 - \gamma)} \log(|S||A|) \text{ and } \alpha_4 c_u \leq \frac{24 \log(|S||A|)}{(1 - \gamma)} (J^2 + \|Q^*\|_{\infty, E}^2).$$

$\square$

## C Implementation Detail for Numerical Experiments

### C.1 Setup

We consider an MRP with  $|\mathcal{S}| = 100$  states, where rewards and transition probabilities are generated as follows:

Rewards: The reward  $\mathcal{R}(s)$  for each state is drawn from the uniform distribution on  $[0, 1]$ .

Transition probabilities: For each state  $s \in \mathcal{S}$ , the transition probabilities  $P(s, s')$  to each successor state  $s' \in \mathcal{S}$  are chosen as random partitions of the unit interval. That is,  $|\mathcal{S}| - 1$  numbers are chosen uniformly randomly between 0 and 1, dividing that interval into  $|\mathcal{S}|$  numbers that sum to one – the probabilities of the  $|\mathcal{S}|$  successor states.

We first compute the stationary distribution  $\pi$  of the MRP, and then obtain the average-reward  $r^* := \pi^\top \mathcal{R}$ , and the basic differential value function  $v^*$  by solving the following linear system of equations:

$$(I - P)v^* = \mathcal{R} - r^*e \text{ and } \pi^\top v^* = 0.$$

For linear function approximation, we consider a feature matrix  $\Phi$  with  $d = 20$  features for each state  $s \in \mathcal{S}$ . We first generate a matrix  $\tilde{\Phi} \in \mathbb{R}^{|\mathcal{S}| \times (d-2)}$ , where each element is drawn from the Bernoulli distribution with success probability  $p = 0.5$ . Then, we construct  $\Phi \in \mathbb{R}^{|\mathcal{S}| \times d}$  by stacking the all-ones vector  $e$  and the basic differential value function  $v^*$  as columns into the the matrix  $\tilde{\Phi}$ , i.e.,  $\Phi := [\tilde{\Phi} \ e \ v^*]$ . We repeat this process until we obtain a full column rank feature matrix. We further normalize the features to ensure  $\|\phi(s)\| \leq 1$  for all  $s \in \mathcal{S}$ . With the above feature matrix, we can easily compute  $\theta_e$  and  $\theta^*$  by solving

$$\Phi\theta_e = e \text{ and } \Phi\theta^* = v^*.$$

### C.2 1st Experiment

In the first experiment, we show that the iterates  $\theta_t$  of Alorithm 1 converge to different TD limit points when the initial points  $\theta_0$  are different. We set  $\lambda = 0$ ,  $c_\alpha = 1$ ,  $T = 100,000$ ,  $\beta_t = \frac{150}{t+1000}$  and  $\bar{r}_0 = 0$ . We draw 4  $d$ -dimensional vectors from the uniform distribution with lower bound  $= -5$  and upper bound  $= 5$ . We then use each of the samples as the initial guess  $\theta_0$ , and plot  $\mathbb{E} [\|\Pi_{2,E}(\theta_t - \theta^*)\|_2]$  and  $\mathbb{E} \left[ (\theta_t - \theta^*)^\top \frac{\theta_e}{\|\theta_e\|_2} \right]$  in Figure 1 and 2. Note that, each curve is average over 100 independent runs with the same  $\theta_0$ .

### C.3 2nd Experiment

In the second experiment, we empirically verify the performance upper bounds of Alorithm 1 in Theorem 1. We set  $c_\alpha = 1$ ,  $T = 1,000,000$ ,  $\beta_t = \frac{150}{t+1000}$ ,  $\bar{r}_0 = 0$  and  $\theta_0 = 0$  and consider  $\lambda \in \{0, 0.2, 0.4, 0.8\}$ . In Figure 3, we plot  $\mathbb{E} \left[ (\bar{r}_t - r^*)^2 + \|\Pi_{2,E}(\theta_t - \theta^*)\|_2^2 \right]$  as a function of  $t$  for  $t \in [0, 10^5)$ , and in Figure 4, we plot  $\ln \mathbb{E} \left[ (\bar{r}_t - r^*)^2 + \|\Pi_{2,E}(\theta_t - \theta^*)\|_2^2 \right]$  as a function of  $\ln t$  for  $t \in [5 \times 10^5, 10^6)$ . Each curve is average over 100 independent runs with the same  $\lambda$ .

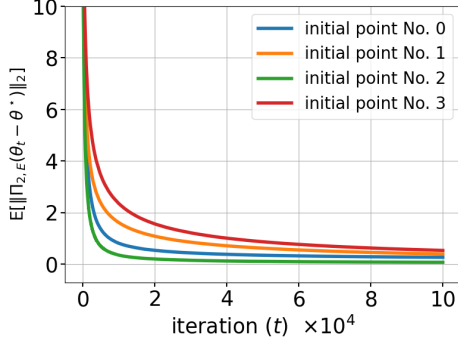

Figure 1: Convergence of the iterates  $\theta_t$  to the set of TD limit points for 4 different initial points.

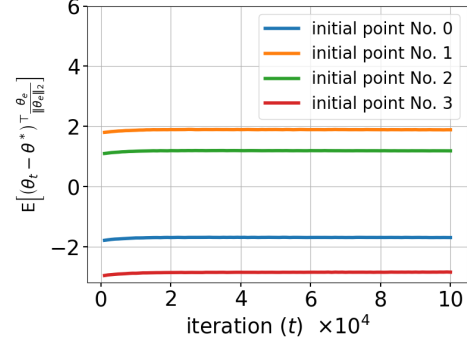

Figure 2: Convergence of the projection of the iterates  $\theta_t$  onto the set of TD limit points for 4 different initial points.

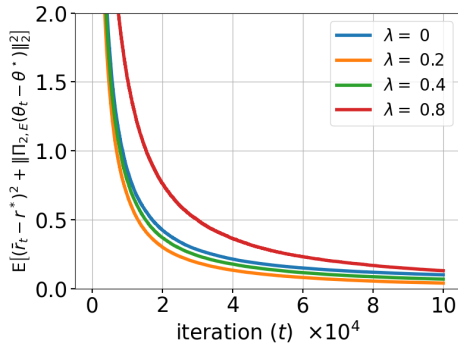

Figure 3: Convergence of the iterates  $(\bar{r}_t, \theta_t)$  for  $\lambda \in \{0, 0.2, 0.4, 0.8\}$ .

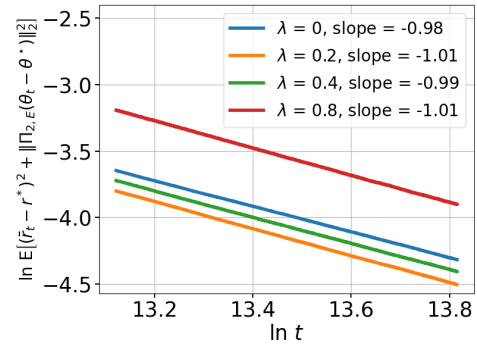

Figure 4: Asymptotic convergence rate of the iterates  $(\bar{r}_t, \theta_t)$  for  $\lambda \in \{0, 0.2, 0.4, 0.8\}$ .
